# Supplementary material for: An integrated microfluidic platform for detection of ovarian clear cell carcinoma mRNA biomarker FXYD2
Source: Royal Society of Chemistry journal article supplement (doi:10.1039/d1lc00177a), 2021-01-01
Supplement: d1lc00177a1.pdf [file d1lc00177a1.pdf]

## Supplemental information

### An Integrated Microfluidic Platform for Detection of Ovarian Clear Cell Carcinoma mRNA Biomarker FXYD2

Yi-Da Chung<sup>1</sup>, Ting-Hang Liu<sup>1</sup>, Yu-Ling Liang<sup>2</sup>, Chang-Ni Lin<sup>2</sup>, Keng-Fu Hsu<sup>2\*\*</sup>, and Gwo-Bin Lee<sup>1,3,4\*</sup>

<sup>1</sup>Department of Power Mechanical Engineering, National Tsing Hua University, Hsinchu, Taiwan

<sup>2</sup>Department of Obstetrics and Gynecology, National Cheng Kung University Hospital, College of Medicine, National Cheng Kung University, Tainan, Taiwan

<sup>3</sup>Institute of Nano Engineering and MicroSystems, National Tsing Hua University, Hsinchu, Taiwan

<sup>4</sup>Institute of Biomedical Engineering, National Tsing Hua University, Hsinchu, Taiwan

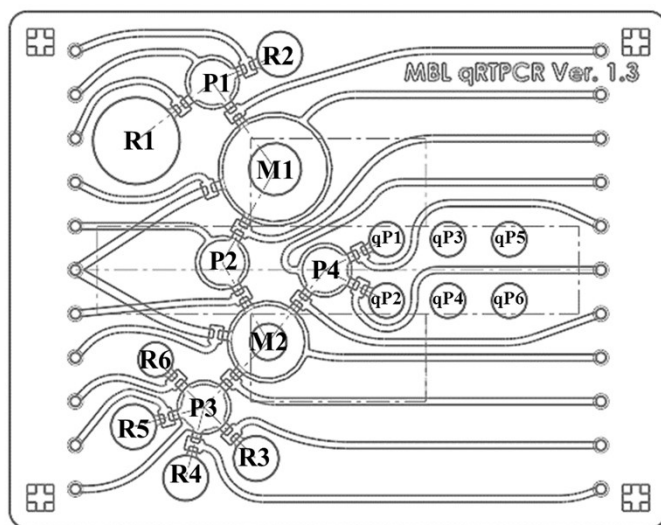

**Figure S1.** The microfluidic chip for mRNA detection with microcomponents coded for interpretation of Table S1. R1, R2, R3, R4, R5 and R6 are reservoirs for PBS, lysis buffer, Buffer A, Buffer B, Tris-HCl, and water, respectively; P1-4 are micropumps for transporting liquids; M1 and M2 are the micromixer/micropumps in zones 1 and 2, respectively; qP1 and qP2 are the qRT-PCR chambers for the target and reference gene, respectively. The qP3 and qP5 wells were loaded with the negative and positive controls for FXYD2 qPCR, respectively. Meanwhile, the qP4 and qP6 wells were preloaded with the negative and positive controls for GAPDH qPCR, respectively.

**Table S1.** The actuation procedures of the on-chip detection protocol

| Protocol                | Steps and duration (min)                | Reagents                                                              | Chamber/micro-component | Volume      |
|-------------------------|-----------------------------------------|-----------------------------------------------------------------------|-------------------------|-------------|
| 1. Reagent pre-loadings |                                         | PBS                                                                   | R1                      | 400 $\mu$ L |
|                         |                                         | Lysis buffer                                                          | R2                      | 100 $\mu$ L |
|                         |                                         | Buffer A                                                              | R3                      | 100 $\mu$ L |
|                         |                                         | Buffer B                                                              | R4                      | 100 $\mu$ L |
|                         |                                         | Tris buffer                                                           | R5                      | 100 $\mu$ L |
|                         |                                         | ddH <sub>2</sub> O                                                    | R6                      | 50 $\mu$ L  |
|                         |                                         | Oligo-dT beads                                                        | M2                      |             |
|                         |                                         | FXYD2 qRT-PCR mixture                                                 | qP1                     | 10 $\mu$ L  |
|                         | GAPDH qRT-PCR mixture                   | qP2                                                                   | 10 $\mu$ L              |             |
| 2. Cancer cell capture  | a. Sample loading                       | 200 $\mu$ L PBS-resuspended ascites + 20 $\mu$ L aptamer-coated beads | M1                      | 220 $\mu$ L |
|                         | b. Sample mixing (20)                   | 220 $\mu$ L cells and bead mixture                                    | M1                      | 220 $\mu$ L |
|                         | c. Bead capture (3)                     | 220 $\mu$ L cells and bead mixture                                    | M1                      | 220 $\mu$ L |
|                         | d. Supernatant removal (1)              | 220 $\mu$ L cells and bead mixture                                    | M1 $\rightarrow$ W      | 220 $\mu$ L |
|                         | e. PBS washing                          | 20 $\mu$ L PBS                                                        | R1 $\rightarrow$ P1     | 20 $\mu$ L  |
|                         | f. PBS washing                          | 20 $\mu$ L PBS                                                        | P1 $\rightarrow$ M1     | 20 $\mu$ L  |
|                         | g. Repeat e & f 9 times (1)             | 20 $\mu$ L PBS                                                        |                         |             |
|                         | h. PBS washing (1)                      | 200 $\mu$ L PBS with beads                                            | M1                      | 200 $\mu$ L |
|                         | i. Bead capture (3)                     | 200 $\mu$ L PBS with beads                                            | M1                      | 200 $\mu$ L |
|                         | j. Supernatant removal (1)              | 200 $\mu$ L PBS with beads                                            | M1                      | 200 $\mu$ L |
|                         | k. Repeat e-j once (6)                  |                                                                       |                         |             |
| 3. Cell lysis           | a. Lysis buffer addition                | 20 $\mu$ L Lysis buffer                                               | R2 $\rightarrow$ P1     | 20 $\mu$ L  |
|                         | b. Lysis buffer addition                | 20 $\mu$ L Lysis buffer                                               | P1 $\rightarrow$ M1     | 20 $\mu$ L  |
|                         | c. Repeat a & b 4 times (1)             |                                                                       |                         |             |
|                         | d. Gentle mixing (5)                    | 100 $\mu$ L Lysis buffer                                              | M1                      | 100 $\mu$ L |
|                         | e. Bead capture (3)                     | 100 $\mu$ L Lysis buffer                                              | M1                      | 100 $\mu$ L |
|                         | f. Lysate transfer to second mixer      | 20 $\mu$ L Lysate                                                     | M1 $\rightarrow$ P2     | 20 $\mu$ L  |
|                         | g. Lysate transfer to second mixer      | 20 $\mu$ L Lysate                                                     | P2 $\rightarrow$ M2     | 20 $\mu$ L  |
|                         | h. Repeat e-g 4 times (1)               | 20 $\mu$ L Lysate                                                     |                         |             |
| 4. mRNA extraction      | a. Lysate and oligo-dT bead mixing (15) | 100 $\mu$ L Lysate + oligo-dT beads                                   | M2                      | 100 $\mu$ L |
|                         | b. Bead capture (3)                     | 100 $\mu$ L Lysate + oligo-dT beads                                   | M2                      | 100 $\mu$ L |
|                         | c. Supernatant removal (1)              | 100 $\mu$ L Lysate + oligo-dT beads                                   | M2 $\rightarrow$ W      | 100 $\mu$ L |
|                         | d. Buffer A addition                    | 20 $\mu$ L Buffer A                                                   | R3 $\rightarrow$ P3     | 20 $\mu$ L  |
|                         | e. Buffer A addition                    | 20 $\mu$ L Buffer A                                                   | P3 $\rightarrow$ M2     | 20 $\mu$ L  |
|                         | f. Repeat d & e 4 times (1)             |                                                                       |                         |             |
|                         | g. Buffer A washing (1)                 | 100 $\mu$ L Buffer A + oligo-dT beads                                 | M2                      | 100 $\mu$ L |
|                         | h. Bead capture (3)                     | 100 $\mu$ L Buffer A + oligo-dT beads                                 | M2                      | 100 $\mu$ L |
|                         | i. Supernatant removal (1)              | 100 $\mu$ L Buffer A + oligo-dT beads                                 | M2 $\rightarrow$ W      | 100 $\mu$ L |

|                        |                                     |                                                |                            |             |
|------------------------|-------------------------------------|------------------------------------------------|----------------------------|-------------|
|                        | j. Buffer B addition                | 20 $\mu$ L Buffer B                            | R4 $\rightarrow$ P3        | 20 $\mu$ L  |
|                        | k. Buffer B addition                | 20 $\mu$ L Buffer B                            | P3 $\rightarrow$ M2        | 20 $\mu$ L  |
|                        | l. Repeat j & k 4 times (1)         |                                                |                            |             |
|                        | m. Buffer B washing (1)             | 100 $\mu$ L Buffer B                           | M2                         | 100 $\mu$ L |
|                        | n. Bead capture (3)                 | 100 $\mu$ L Buffer B + oligo-dT beads          | M2                         | 100 $\mu$ L |
|                        | o. Supernatant removal (1)          | 100 $\mu$ L Buffer B + oligo-dT beads          | M2 $\rightarrow$ W         | 100 $\mu$ L |
|                        | p. Tris buffer addition             | 20 $\mu$ L Tris buffer                         | R5 $\rightarrow$ P3        | 20 $\mu$ L  |
|                        | q. Tris buffer addition             | 20 $\mu$ L Tris buffer                         | P3 $\rightarrow$ M2        | 20 $\mu$ L  |
|                        | r. Repeat p & q 4 times (1)         |                                                |                            |             |
|                        | s. Tris buffer washing (1)          | 100 $\mu$ L Tris buffer                        | M2                         | 100 $\mu$ L |
|                        | t. Bead capture (3)                 | 100 $\mu$ L Tris buffer + oligo-dT beads       | M2                         | 100 $\mu$ L |
|                        | u. Supernatant removal (1)          | 100 $\mu$ L Tris buffer + oligo-dT beads       | M2 $\rightarrow$ W         | 100 $\mu$ L |
|                        | v. Water addition                   | 20 $\mu$ L ddH <sub>2</sub> O                  | R6 $\rightarrow$ P3        | 20 $\mu$ L  |
|                        | w. Water addition (1)               | 20 $\mu$ L ddH <sub>2</sub> O                  | P3 $\rightarrow$ M2        | 20 $\mu$ L  |
| 5. qRT-PCR preparation | a. Mix oligo-dT beads (1)           | 20 $\mu$ L ddH <sub>2</sub> O + oligo-dT beads | M2                         | 20 $\mu$ L  |
|                        | b. Transfer to qRT-PCR chambers     | 20 $\mu$ L ddH <sub>2</sub> O + oligo-dT beads | M2 $\rightarrow$ P4        | 20 $\mu$ L  |
|                        | c. Transfer to qRT-PCR chambers (1) | 20 $\mu$ L ddH <sub>2</sub> O + oligo-dT beads | P4 $\rightarrow$ qP1 & qP2 | 20 $\mu$ L  |
| 6. qRT-PCR             | a. qRT-PCR (140)                    |                                                | qP1, qP2, qP3-qP6          | 20 $\mu$ L  |

## Supplemental videos

The link for the video showing the liquid transport in the microfluidic chip.

## Supplemental methods

### Cell culture

Cells were sub-cultured every 3 to 4 days with 10 mL of culture media in a sterile petri dish (100 mm x 15 mm) as follows. First, old media was removed, and the cells were washed with sterile 1x PBS (pH 7.4, cat: #10010023, Gibco, USA). Then, 1 mL of trypsin (TFS) was added to detach cells for 5 min. The detached cells were pelleted at 300  $\times$ g for 5 min, resuspended in 1 mL of 1X PBS, and  $\sim 10^4$  cells were inoculated in fresh media at 37°C with humidified 5% CO<sub>2</sub>. TOV-21G cells (ATCC, USA) were maintained in 10 mL of a 1:1 mixture of MCDB 105 media (M6395; Sigma-Aldrich) containing a final concentration of 1.5 g/L sodium bicarbonate and Medium 199 (M5017; Sigma-Aldrich) containing a final concentration of 2.2 g/L sodium bicarbonate. The base media was supplemented with 10% fetal bovine serum (FBS; TFS). OVCAR-3 cells (National Cancer Institute #0507709, USA) were maintained in RPMI-1640 cell culture media (Gibco) with 10% FBS. N(E6+E7) cells were provided by NCKUH and cultured in Keratinocyte-SFM 1x (17005042; Gibco). For media preparation, 500 mL of basal media were mixed with 25 mg bovine pituitary extract (BPE) and 2.5  $\mu$ g human recombinant epidermal growth factor (EGF). These two supplements both were provided with the basal media.

### Preparation of aptamer-coated nano-magnetic beads (NMBs)

A previously screened aptamer (21G-2)<sup>31</sup> against TOV-21G cells was conjugated to the surface of AllMag<sup>TM</sup> NMBs (PM3-020, So-Fe Biomedicine, China) through N-(3-

dimethylaminopropyl)-N'-ethylcarbodiimide hydrochloride (EDC)/N-hydroxysulfosuccinimide sodium salt (NHS) activation. First, 200  $\mu\text{L}$  of NMB (10 mg/mL,  $1.4 \times 10^{11}$  beads/mL) were washed twice with 500  $\mu\text{L}$  of 10 mM 2-(N-morpholino)-ethanesulfonic acid (MES) buffer with 0.05% Tween-20 (MEST; pH 6.0) and resuspended in 100  $\mu\text{L}$  of 10 mM MES. Then, 200  $\mu\text{L}$  of 5 mg/mL EDC and 200  $\mu\text{L}$  of 5 mg/mL NHS (H52795, Alfa Aesar, USA) were added to the washed NMB in 500  $\mu\text{L}$  of MES buffer. The carboxyl groups on NMB were activated via EDC/NHS and incubated at 37°C with continuous rotation at 150 rpm for 30 min. Afterwards, the NMBs were washed twice with 500  $\mu\text{L}$  of MEST buffer. Then, 500  $\mu\text{L}$  of 1  $\mu\text{M}$  aptamer were added, and the mixture was incubated for 3 hr at 37°C (150 rpm) to generate aptamer-NMB complexes. The complexes were separated from unreacted reagents by an external magnet (DynaMag™, TFS), with the supernatant then decanted. The collected conjugates were washed twice with 1 mL of 1x PBS with 0.05% Tween-20 (pH 7.4), resuspended in 2 mL of 1x PBS at a final concentration of 1 mg/mL, and stored at 4°C.

### **Oligo-dT beads for mRNA capture**

According to the manual provided by the manufacturer, the mRNA binding capacity of oligo-dT beads used within the Dynabeads™ mRNA DIRECT™ Purification Kit (TFS) is that 1 mg beads can bind to 2  $\mu\text{g}$  mRNA. After calculation, it was then estimated that 5  $\mu\text{L}$  of oligo-dT beads for each reaction could be sufficient to capture 50 ng mRNA. From the same manual, it also reported that the amount of mRNA for one mammalian cell is about 1-5% of total RNA which is about 10-30 pg each cell. Furthermore, the total RNA was reported to be about 10 pg, and the mRNA was 0.1 pg for a mammalian cell (Tang, F., Lao, K. & Surani, M. *Nat Methods* 2011, **8**, S6–S11). When assuming the highest amount mRNA for each cell, for the highest cell number ( $10^4$ ) in each reaction, it was calculated that the mRNA was about 15 ng. Therefore, the amount of oligo-dT beads should be sufficient in most cases for capturing the mRNA from lysed cells.
